# Supplementary material
Source: publisher site journal article supplement (https://www.dovepress.com/article/260684)
Supplement: Supplementary file 1 [file get_supplementary_file.php]

**Appendix 1. PubMed Search on 07/02/2019**

PubMed: *Copy and paste the following search into the* [*PubMed search bar*](https://www.ncbi.nlm.nih.gov/pubmed/) *in order to see the results*

("Renal Dialysis"[Mesh] OR dialysis[tiab] OR dialyses[tiab] OR hemodialysis[tiab] OR hemodialyses[tiab] OR haemodialysis[tiab] OR haemodialyses[tiab]) AND ("Therapeutic Alliance"[Mesh] OR "therapeutic alliance"[tiab] OR "therapeutic alliances"[tiab] OR "therapy alliance"[tiab] OR "therapy alliances"[tiab] OR "therapeutic relationship"[tiab] OR "therapeutic relationships"[tiab] OR "therapy relationship"[tiab] OR "therapy relationships"[tiab] OR "working alliance"[tiab] OR "working alliances"[tiab] OR "Motivational Interviewing"[Mesh] OR "motivational interviewing"[tiab] OR "motivational interview"[tiab] OR "motivational interviews"[tiab] OR "motivation interviewing"[tiab] OR "motivation interview"[tiab] OR "Social Support"[Mesh] OR "social support"[tiab] OR "support system"[tiab] OR "support systems"[tiab] OR "family support"[tiab] OR "familial support"[tiab] OR "family member support"[tiab] OR "supportive family"[tiab] OR "supportive families"[tiab] OR "community support"[tiab] OR "supportive community"[tiab] OR "supportive communities"[tiab] OR "health system support"[tiab] OR "Directive Counseling"[Mesh] OR "directive counseling"[tiab] OR "directive counsel"[tiab] OR "prescriptive counseling"[tiab] OR "Patient Care Team"[Mesh] OR "patient care team"[tiab] OR "patient care teams"[tiab] OR "health care team"[tiab] OR "health care teams"[tiab] OR "healthcare team"[tiab] OR "healthcare teams"[tiab] OR "health team"[tiab] OR "health teams"[tiab] OR "medical care team"[tiab] OR "medical care teams"[tiab] OR multidisciplinary[tiab] OR multi-disciplinary[tiab] OR interdisciplinary[tiab] OR inter-disciplinary[tiab] OR multidisciplinarity[tiab] OR multi-disciplinarity[tiab] OR interdisciplinarity[tiab] OR inter-disciplinarity[tiab] OR "team based"[tiab] OR "Patient Care Management"[Mesh] OR "patient care management"[tiab] OR "patient management"[tiab] OR "care management"[tiab] OR "therapy management"[tiab] OR "therapy control"[tiab] OR "treatment management"[tiab] OR "treatment control"[tiab] OR "therapeutic management"[tiab] OR "therapeutic control"[tiab] OR "disease management"[tiab] OR "disease control"[tiab] OR "chronic condition management"[tiab] OR "chronic illness management"[tiab] OR "Self-Management"[Mesh] OR "self management"[tiab] OR "self managed"[tiab] OR "self managing"[tiab] OR "self manages"[tiab]) AND ("dialysis adherence"[tiab] OR "dialysis compliance"[tiab] OR "hemodialysis adherence"[tiab] OR "Treatment Adherence And Compliance"[Mesh:noexp] OR "Patient Compliance"[Mesh:noexp] OR "treatment adherence"[tiab] OR "treatment adherent"[tiab] OR "treatment nonadherence"[tiab] OR "treatment nonadherent"[tiab] OR "treatment non-adherence"[tiab] OR "treatment non-adherent"[tiab] OR "treatment compliance"[tiab] OR "treatment compliant"[tiab] OR "treatment noncompliance"[tiab] OR "treatment non-compliance"[tiab] OR "patient adherence"[tiab] OR "patient nonadherence"[tiab] OR "patient non-adherence"[tiab] OR "patient compliance"[tiab] OR "patient noncompliance"[tiab] OR "patient non-compliance"[tiab] OR "therapy adherence"[tiab] OR "therapy adherent"[tiab] OR "therapy nonadherence"[tiab] OR "therapy non-adherence"[tiab] OR "therapy compliance"[tiab] OR "therapy compliant"[tiab] OR "therapy noncompliance"[tiab] OR "therapy non-compliance"[tiab] OR "therapeutic adherence"[tiab] OR "therapeutic nonadherence"[tiab] OR "therapeutic non-adherence"[tiab] OR "therapeutic compliance"[tiab] OR "therapeutic noncompliance"[tiab] OR "therapeutic non-compliance"[tiab] OR "Hospitalization/statistics and numerical data"[Mesh] OR "hospitalization rate"[tiab] OR "hospitalization rates"[tiab] OR "hospitalization number"[tiab] OR "hospitalization numbers"[tiab] OR "number of hospitalizations"[tiab] OR "increased hospitalization"[tiab] OR "increased hospitalizations"[tiab] OR "decreased hospitalization"[tiab] OR "decreased hospitalizations"[tiab] OR "dialysis attendance"[tiab] OR "hemodialysis attendance"[tiab] OR "missed dialysis"[tiab] OR "shortened dialysis"[tiab] OR "shortening dialysis"[tiab] OR "shortened treatment"[tiab] OR "shortened treatments"[tiab] OR "shortening treatment"[tiab] OR "shortening treatments"[tiab] OR "skipped treatments"[tiab] OR "skipping treatment"[tiab] OR "skipping treatments"[tiab] OR "session adherence"[tiab] OR "session compliance"[tiab]) AND ("2009/01/01"[PDAT] : "2019/12/31"[PDAT] AND English[lang])

**226 Results**
Limited to publication dates 2009-2019
Limited to English

**Appendix 2. CINAHL Search on 07/02/2019**

CINAHL: *Copy and paste the following search into the* [*CINAHL search bar*](https://www.library.vanderbilt.edu/eres?id=29) *in order to see the results*

(MH “Hemodialysis+” OR MH “Dialysis Patients” OR TI dialysis OR AB dialysis OR TI dialyses OR AB dialyses OR TI hemodialysis OR AB hemodialysis OR TI hemodialyses OR AB hemodialyses OR TI haemodialysis OR AB haemodialysis OR TI haemodialyses OR AB haemodialyses) AND (MH “Therapeutic Alliance” OR TI “therapeutic alliance” OR AB “therapeutic alliance” OR TI “therapeutic alliances” OR AB “therapeutic alliances” OR TI “therapy alliance” OR AB “therapy alliance” OR TI “therapy alliances” OR AB “therapy alliances” OR TI “therapeutic relationship” OR AB “therapeutic relationship” OR TI “therapeutic relationships” OR AB “therapeutic relationships” OR TI “therapy relationship” OR AB “therapy relationship” OR TI “therapy relationships” OR AB “therapy relationships” OR TI “working alliance” OR AB “working alliance” OR TI “working alliances” OR AB “working alliances” OR MH “Motivational Interviewing” OR TI “motivational interviewing” OR AB “motivational interviewing” OR TI “motivational interview” OR AB “motivational interview” OR TI “motivational interviews” OR AB “motivational interviews” OR TI “motivation interviewing” OR AB “motivation interviewing” OR TI “motivation interview” OR AB “motivation interview” OR TI “motivation interviews” OR AB “motivation interviews” OR MH “Support, Psychosocial+” OR TI “social support” OR AB “social support” OR TI “support system” OR AB “support system” OR TI “support systems” OR AB “support systems” OR TI “family support” OR AB “family support” OR TI “familial support” OR AB “familial support” OR TI “family member support” OR AB “family member support” OR TI “supportive family” OR AB “supportive family” OR TI “supportive families” OR AB “supportive families” OR TI “community support” OR AB “community support” OR TI “supportive community” OR AB “supportive community” OR TI “supportive communities” OR AB “supportive communities” OR TI “health system support” OR AB “health system support” OR TI “directive counseling” OR AB “directive counseling” OR TI “directive counsel” OR AB “directive counsel” OR TI “prescriptive counseling” OR AB “prescriptive counseling” OR MH “Multidisciplinary Care Team+” OR TI “patient care team” OR AB “patient care team” OR TI “patient care teams” OR AB “patient care teams” OR TI “health care team” OR AB “health care team” OR TI “health care teams” OR AB “health care teams” OR TI “healthcare team” OR AB “healthcare team” OR TI “healthcare teams” OR AB “healthcare teams” OR TI “health team” OR AB “health team” OR TI “health teams” OR AB “health teams” OR TI “medical care team” OR AB “medical care team” OR TI “medical care teams” OR AB “medical care teams” OR TI multidisciplinary OR AB multidisciplinary OR TI multi-disciplinary OR AB multi-disciplinary OR TI interdisciplinary OR AB interdisciplinary OR TI inter-disciplinary OR AB inter-disciplinary OR TI multidiscinplinarity OR AB multidisciplinarity OR TI multi-disciplinarity OR AB multi-disciplinarity OR TI interdisciplinarity OR AB interdisciplinarity OR TI inter-disciplinarity OR AB inter-disciplinarity OR TI “team based” OR TI “patient care management” OR AB “patient care management” OR TI “patient management” OR AB “patient management” OR TI “care management” OR AB “care management” OR TI “therapy management” OR AB “therapy management” OR TI “therapy control” OR AB “therapy control” OR TI “treatment management” OR AB “treatment management” OR TI “treatment control” OR AB “treatment control” OR TI “therapeutic management” OR AB “therapeutic management” OR TI “therapeutic control” OR AB “therapeutic control” OR MH “Disease Management+” OR TI “disease management” OR AB “disease management” OR TI “disease control” OR AB “disease control” OR TI “chronic condition management” OR AB “chronic condition management” OR TI “chronic illness management” OR AB “chronic illness management” OR MH “Self-Management” OR TI “self management” OR AB “self management” OR TI “self manages” OR AB “self manages” OR TI “self managed” OR AB “self managed” OR TI “self managing” OR AB “self managing) AND (TI “dialysis adherence” OR AB “dialysis adherence” OR TI “dialysis compliance” OR AB “dialysis compliance” OR TI “hemodialysis adherence” OR AB “hemodialysis adherence” OR MH “Patient Compliance” OR TI “treatment adherence” OR AB “treatment adherence” OR TI “treatment adherent” OR AB “treatment adherent” OR TI “treatment nonadherence” OR AB “treatment nonadherence” OR TI “treatment non-adherence” OR AB “treatment non-adherence” OR TI “treatment non-adherent” OR AB “treatment non-adherent” OR TI “treatment compliance” OR AB “treatment compliance” OR TI “treatment compliant” OR AB “treatment compliant” OR TI “treatment noncompliance” OR AB “treatment noncompliance” OR TI “treatment non-compliance” OR AB “treatment non-compliance” OR TI “patient adherence” OR AB “patient adherence” OR TI “patient nonadherence” OR AB “patient nonadherence” OR TI “patient non-adherence” OR AB “patient non-adherence” OR TI “patient compliance” OR AB “patient compliance” OR TI “patient noncompliance” OR AB “patient noncompliance” OR TI “patient non-compliance” OR AB “patient non-compliance” OR TI “therapy adherence” OR AB “therapy adherence” OR TI “therapy adherent” OR AB “therapy adherent” OR TI “therapy nonadherence” OR AB “therapy nonadherence” OR TI “therapy non-adherence” OR AB “therapy non-adherence” OR TI “therapy compliance” OR AB “therapy compliance” OR TI “therapy compliant” OR AB “therapy compliant” OR TI “therapy noncompliance” OR AB “therapy noncompliance” OR TI “therapy non-compliance” OR AB “therapy non-compliance” OR TI “therapeutic adherence” OR AB “therapeutic adherence” OR TI “therapeutic nonadherence” OR AB “therapeutic nonadherence” OR TI “therapeutic non-adherence” OR AB “therapeutic non-adherence” OR TI “therapeutic compliance” OR AB “therapeutic compliance” OR TI “therapeutic noncompliance” OR AB “therapeutic noncompliance” OR TI “therapeutic non-compliance” OR AB “therapeutic non-compliance” OR MH “Hospitalization+/SN” OR TI “hospitalization rate” OR AB “hospitalization rate” OR TI “hospitalization rates” OR AB “hospitalization rates” OR TI “hospitalization number” OR AB “hospitalization number” OR TI “hospitalization numbers” OR AB “hospitalization numbers” OR TI “number of hospitalizations” OR AB “number of hospitalizations” OR TI “increased hospitalization” OR AB “increased hospitalization” OR TI “increased hospitalizations” OR AB “increased hospitalizations” OR TI “decreased hospitalization” OR AB “decreased hospitalization” OR TI “decreased hospitalizations” OR AB “decreased hospitalizations” OR TI “dialysis attendance” OR AB “dialysis attendance” OR TI “hemodialysis attendance” OR AB “hemodialysis attendance” OR TI “missed dialysis” OR AB “missed dialysis” OR TI “shortened dialysis” OR AB “shortened dialysis” OR TI “shortening dialysis” OR AB “shortening dialysis” OR TI “shortened treatment” OR AB “shortened treatment” OR TI “shortened treatments” OR AB “shortened treatments” OR TI “shortening treatment” OR AB “shortening treatment” OR TI “shortening treatments” OR AB “shortening treatments” OR TI “skipped treatments” OR AB “skipped treatments” OR TI “skipping treatment” OR AB “skipping treatment” OR TI “skipping treatments” OR AB “skipping treatments” OR TI “session adherence” OR AB “session adherence” OR TI “session compliance” OR AB “session compliance”)

1,480 Results
**877 Results** when limited to English and publication dates 2009-2019

Note: You can add filters by selecting “Search History” underneath the search bar and then selecting “Edit”

**Appendix 3. Embase Search on 07/02/2019**

Embase: *Copy and paste the following search into the* [*Embase search bar*](http://www.mc.vanderbilt.edu/ckm/diglib/ckmres.html?rid=197) *in order to see the results*

(exp hemodialysis/ OR (dialysis or dialyses or hemodialysis or hemodialyses or haemodialysis or haemodialyses).ab,ti.) AND (("therapeutic alliance" or "therapeutic alliances" or "therapy alliance" or "therapy alliances" or "therapeutic relationship" or "therapeutic relationships" or "therapy relationship" or "therapy relationships" or "working alliance" or "working alliances").ab,ti. OR exp motivational interviewing/ OR ("motivational interviewing" or "motivational interview" or "motivational interviews" or "motivation interviewing" or "motivation interview" or "motivation interviews").ab,ti. OR ("social support" or "support system" or "support systems" or "family support" or "familial support" or "family member support" or "supportive family" or "supportive families" or "community support" or "supportive community" or "supportive communities" or "health system support").ab,ti. OR exp directive counseling/ OR ("directive counseling" or "directive counsel" or "prescriptive counseling").ab,ti. OR exp patient care/ OR ("patient care team" or "patient care teams" or "health care team" or "health care teams" or "healthcare team" or "healthcare teams" or "health team" or "health teams" or "medical care team" or "medical care teams" or multidisciplinary or multi-disciplinary or interdisciplinary or inter-disciplinary or multidisciplinarity or multi-disciplinarity or interdisciplinarity or inter-disciplinarity or "team based" or "patient care management" or "patient management" or "care management" or "therapy management" or "therapy control" or "treatment management" or "treatment control" or "therapeutic management" or "therapeutic control" or "disease management" or "disease control" or "chronic condition management" or "chronic illness management" or "self management" or "self managed" or "self managing" or "self manages").ab,ti. OR exp self care/) AND (("dialysis adherence" or "dialysis compliance" or "hemodialysis adherence").ab,ti. OR patient compliance/ OR ("treatment adherence" or "treatment adherent" or "treatment nonadherence" or "treatment nonadherent" or "treatment non-adherence" or "treatment non-adherent" or "treatment compliance" or "treatment compliant" or "treatment noncompliance" or "treatment non-compliance" or "patient adherence" or "patient nonadherence" or "patient non-adherence" or "patient compliance" or "patient noncompliance" or "patient non-compliance" or "therapy adherence" or "therapy adherent" or "therapy nonadherence" or "therapy non-adherence" or "therapy compliance" or "therapy compliant" or "therapy noncompliance" or "therapy non-compliance" or "therapeutic adherence" or "therapeutic nonadherence" or "therapeutic non-adherence" or "therapeutic compliance" or "therapeutic noncompliance" or "therapeutic non-compliance").ab,ti. OR exp hospitalization/ OR ("hospitalization rate" or "hospitalization rates" or "hospitalization number" or "hospitalization numbers" or "number of hospitalizations" or "increased hospitalization" or "increased hospitalizations" or "decreased hospitalization" or "decreased hospitalizations" or "dialysis attendance" or "hemodialysis attendance" or "missed dialysis" or "shortened dialysis" or "shortening dialysis" or "shortened treatment" or "shortened treatments" or "shortening treatment" or "shortening treatments" or "skipped treatments" or "skipping treatment" or "skipping treatments" or "session adherence" or "session compliance").ab,ti.)

1,238 Results 
**495 Results** when limited to English, publication dates 2009-2019, and with conference abstracts removed

Note: You can add filters by selecting “Additional Limits” in the blue box, underneath the search bar

**Appendix 4. PsycINFO Search on 07/02/2019**

PsycINFO: *Copy and paste the following search into the* [*PsycINFO search bar*](http://www.library.vanderbilt.edu/eres?id=143) *in order to see the results*

(MAINSUBJECT.EXACT.EXPLODE("Hemodialysis") OR TI(dialysis) OR AB(dialysis) OR TI(dialyses) OR AB(dialyses) OR TI(hemodialysis) OR AB(hemodialysis) OR TI(hemodialyses) OR AB(hemodialyses) OR TI(haemodialysis) OR AB(haemodialysis) OR TI(haemodialyses) OR AB(haemodialyses)) AND (MAINSUBJECT.EXACT.EXPLODE("Therapeutic Alliance") OR TI("therapeutic alliance") OR AB("therapeutic alliance") OR TI("therapeutic alliances") OR AB("therapeutic alliances") OR TI("therapy alliance") OR AB("therapy alliance") OR TI("therapy alliances") OR AB("therapy alliances") OR TI("therapeutic relationship") OR AB("therapeutic relationship") OR TI("therapeutic relationships") OR AB("therapeutic relationships") OR TI("therapy relationship") OR AB("therapy relationship") OR TI("therapy relationships") OR AB("therapy relationships") OR TI("working alliance") OR AB("working alliance") OR TI("working alliances") OR AB("working alliances") OR MAINSUBJECT.EXACT.EXPLODE("Motivational Interviewing") OR TI("motivational interviewing") OR AB("motivational interviewing") OR TI("motivational interview") OR AB("motivational interview") OR TI("motivational interviews") OR AB("motivational interviews") OR TI("motivation interviewing") OR AB("motivation interviewing") OR TI("motivation interview") OR AB("motivation interview") OR TI("motivation interviews") OR AB("motivation interviews") OR MAINSUBJECT.EXACT.EXPLODE("Social Support") OR TI("social support") OR AB("social support") OR TI("support system") OR AB("support system") OR TI("support systems") OR AB("support systems") OR TI("family support") OR AB("family support") OR TI("familial support") OR AB("familial support") OR TI("family member support") OR AB("family member support") OR TI("supportive family") OR AB("supportive family") OR TI("supportive families") OR AB("supportive families") OR TI("community support") OR AB("community support") OR TI("supportive community") OR AB("supportive community") OR TI("supportive communities") OR AB("supportive communities") OR TI("health system support") OR AB("health system support") OR TI("directive counseling") OR AB("directive counseling") OR TI("directive counsel") OR AB("directive counsel") OR TI("prescriptive counseling") OR AB("prescriptive counseling") OR TI("patient care team") OR AB("patient care team") OR TI("patient care teams") OR AB("patient care teams") OR TI("health care team") OR AB("health care team") OR TI("health care teams") OR AB("health care teams") OR TI("healthcare team") OR AB("healthcare team") OR TI("healthcare teams") OR AB("healthcare teams") OR TI("health team") OR AB("health team") OR TI("health teams") OR AB("health teams") OR TI("medical care team") OR AB("medical care team") OR TI("medical care teams") OR AB("medical care teams") OR TI(multidisciplinary) OR AB(multidisciplinary) OR TI(multi-disciplinary) OR AB(multi-disciplinary) OR TI(interdisciplinary) OR AB(interdisciplinary) OR TI(inter-disciplinary) OR AB(inter-disciplinary) OR TI(multidisciplinarity) OR AB(multidisciplinarity) OR TI(multi-disciplinarity) OR AB(mutli-disciplinarity) OR TI(interdisciplinarity) OR AB(interdisciplinarity) OR TI(inter-disciplinarity) OR AB(inter-disciplinarity) TI("team based") OR AB("team based") OR MAINSUBJECT.EXACT.EXPLODE("Treatment Planning") OR TI("patient care management") OR AB("patient care management") OR TI("care management") OR AB("care management") OR TI("therapy management") OR AB("therapy management") OR TI("therapy control") OR AB("therapy control") OR TI("treatment management") OR AB("treatment management") OR TI("treatment control") OR AB("treatment control") OR TI("therapeutic management") OR AB("therapeutic management") OR TI("therapeutic control") OR AB("therapeutic control") OR TI("disease management") OR AB("disease management") OR TI("disease control") OR AB("disease control") OR TI("chronic condition management") OR AB("chronic condition management") OR TI("chronic illness management") OR AB("chronic illness management") OR MAINSUBJECT.EXACT.EXPLODE("Self-Management") OR TI("self management") OR AB("self management") OR TI("self managed") OR AB("self managed") OR TI("self managing") OR AB("self managing") OR TI("self manages") OR AB("self manages")) AND (TI(“dialysis adherence”) OR AB(“dialysis adherence”) OR TI(“dialysis compliance”) OR AB(“dialysis compliance”) OR TI(“hemodialysis adherence”) OR AB(“hemodialysis adherence”) OR MAINSUBJECT.EXACT("Treatment Compliance") OR TI("treatment adherence") OR AB("treatment adherence") OR TI("treatment adherent") OR AB("treatment adherent") OR TI("treatment nonadherence") OR AB("treatment nonadherence") OR TI("treatment nonadherent") OR AB("treatment nonadherent") OR TI("treatment non-adherence") OR AB("treatment non-adherence") OR TI("treatment non-adherent") OR AB("treatment non-adherent") OR TI("treatment compliance") OR AB("treatment compliance") OR TI("treatment compliant") OR AB("treatment compliant") OR TI("treatment noncompliance") OR AB("treatment noncompliance") OR TI("treatment non-compliance") OR AB("treatment non-compliance") OR TI("patient adherence") OR AB("patient adherence") OR TI("patient nonadherence") OR AB("patient nonadherence") OR TI("patient non-adherence") OR AB("patient non-adherence") OR TI("patient compliance") OR AB("patient compliance") OR TI("patient noncompliance") OR AB("patient noncompliance") OR TI("patient non-compliance") OR AB("patient non-compliance") OR TI("therapy adherence") OR AB("therapy adherence") OR TI("therapy adherent") OR AB("therapy adherent") OR TI("therapy nonadherence") OR AB("therapy nonadherence") OR TI ("therapy non-adherence") OR AB("therapy non-adherence") OR TI("therapy compliance") OR AB("therapy compliance") OR TI("therapy compliant") OR AB("therapy compliant") OR TI("therapy noncompliance") OR AB("therapy noncompliance") OR TI("therapy non-compliance") OR AB("therapy non-compliance") OR TI("therapeutic adherence") OR AB("therapeutic adherence") OR TI("therapeutic nonadherence") OR AB("therapeutic nonadherence") OR TI("therapeutic non-adherence") OR AB("therapeutic non-adherence") OR TI("therapeutic compliance") OR AB("therapeutic compliance") OR TI("therapeutic noncompliance") OR AB("therapeutic noncompliance") OR TI("therapeutic non-compliance") OR AB("therapeutic non-compliance") OR MAINSUBJECT.EXACT.EXPLODE("Hospitalization") OR TI("hospitalization rate") OR AB("hospitalization rate") OR TI("hospitalization rates") OR AB("hospitalization rates") OR TI("hospitalization number") OR AB("hospitalization number") OR TI("hospitalization numbers") OR AB("hospitalization numbers") OR TI("number of hospitalizations") OR AB("number of hospitalizations") OR TI("increased hospitalization") OR AB("increased hospitalization") OR TI("increased hospitalizations") OR AB("increased hospitalizations") OR TI("decreased hospitalization") OR AB("decreased hospitalization") OR TI("decreased hospitalizations") OR AB("decreased hospitalizations") OR TI("dialysis attendance") OR AB("dialysis attendance") OR TI("hemodialysis attendance") OR AB("hemodialysis attendance") OR TI("missed dialysis") OR AB("missed dialysis") OR TI("shortened dialysis") OR AB("shortened dialysis") OR TI("shortening dialysis") OR AB("shortening dialysis") OR TI("shortened treatment") OR AB("shortened treatment") OR TI("shortened treatments") OR AB("shortened treatments") OR TI("shortening treatment") OR AB("shortening treatment") OR TI("shortening treatments") OR AB("shortening treatments") OR TI("skipped treatments") OR AB("skipped treatments") OR TI("skipping treatment") OR AB("skipping treatment") OR TI("skipping treatments") OR AB("skipping treatments") OR TI("session adherence") OR AB("session adherence") OR TI("session compliance") OR AB("session compliance"))

46 Results
**18 Results** when limited to English and publication dates 2009-2019

Note: Use the options in the left column to add filters

**Appendix 5: Modified risk of bias assessment**

**For the RCTs,** the following were assessed for each of the included studies:

1. Sequence generation – was the allocation sequence random?

2. Allocation concealment – was the allocation sequence concealed until participants were enrolled and assigned to interventions?

3. Blinding – were participants unaware of their assigned intervention during the trial?

4. Level of completion of outcome data - were data for this outcome available for all, or nearly all, participants randomized?

5. Similarity of groups at baseline – did baseline differences between intervention groups suggest a problem with the randomization process?

6. Loss of data (dropouts and withdrawals) –

a. Were outcome data available for all, or nearly all participants?

b. Were participants excluded due to missing data?

7. Study design

a. Is the study design experimental (score of 1) or quasi-experimental (score of 0)?

**For pre-post studies,** each study was assessed for its ability to avoid, control or adjust for the following:

1. Baseline confounding

o  – was there minimal or no potential for confounding of the effect of intervention in this study?

o  - did the authors use an appropriate analysis method that controlled for all the important confounding domains?

       2.    Selection bias – was there adequate effort to avoid selection of participants into the study (or into the analysis) based on participant characteristics observed after the start of intervention?

     3.      Bias in measurement of exposures and outcomes – was there no or minimal chance of the outcome measure being influenced by knowledge of the intervention received?

4. Bias due to deviations from intended interventions

o  Was the intervention implemented successfully across intervention groups?

o  Did study participants adhere to the assigned intervention regimen?

5. Selective reporting of analyses or outcomes, or both – was there minimal or no chance of the reported effect estimate likely to be selected on the basis of the results, from:

o  Multiple outcome measurements within the outcome domain?

o  Multiple analyses of the intervention-outcome relationship?

o  Different subgroups?

6. Bias due to missing data

a. Were outcome data available for all, or nearly all participants?

b. Were participants excluded due to missing data?

7. Study design

a. Is the study design experimental (score of 1) or quasi-experimental (score of 0)?

‘no’ in any of the questions or sub-questions, resulted in scoring that entire question as 0.

**Scoring:**

6 - 7 - low risk; 4 -5 – medium risk; 1- 3 – high risk
